# Supplementary material for: β-Arrestin-dependent and -independent endosomal G protein activation by the vasopressin type 2 receptor
Source: eLife. 2023 Oct 19;12:RP87754. doi: 10.7554/eLife.87754 (PMC10586804; doi:10.7554/eLife.87754)
Supplement: Figure 2—source data 1. [file elife-87754-fig2-data1.xlsx]

## Sheet: Figure 2B
	Vehicle					AVP
mGs	67.57	65.81	57.15	61.82	69.01	69.79	87.67	79.1	83.66	86.26
mGsq	57.6	68.2	63.83	60.1	76.17	78.9	82.54	84.78	80.23	91.61
mGsi	18.67	23.91	19.28	15.02	20.02	25.74	23.34	19.15	19.46	29.57

## Sheet: Figure 2D
	Vehicle						AVP
mGs	33.34	33.38	29.06	57.68	30.14	21.49	69.28	79.45	79.9	64.77	80.6	74.97
mGsq	12.31	24.66	13.99	57.26	37.55	58.05	84.63	97.31	91.2	88.75	83.19	95.39
mGsi	26.23	22.36	21.15	19.23	26.78	19.15	13.88	22.98	27.14	21.01	29.52	27.5
