# Supplementary material for: β-Arrestin-dependent and -independent endosomal G protein activation by the vasopressin type 2 receptor
Source: eLife. 2023 Oct 19;12:RP87754. doi: 10.7554/eLife.87754 (PMC10586804; doi:10.7554/eLife.87754)
Supplement: Figure 3—source data 1. [file elife-87754-fig3-data1.xlsx]

## Sheet: Figure 3A
Time (min)	mGs				mGsi				mGsq				mG12
0	0	0	0
5	0.31	0.31	0.28
7	0.385	0.3875	0.165
10	0.44	0.4725	0.46
15	0.4375	0.4675	0.4125
20	0.4025	0.4375	0.415
35	0.3925	0.42	0.405
53	0.375	0.4	0.405
65	0.3875	0.355	0.3925
0					0	0	0
6					-0.005	-0.005	-0.0025
8					0.0075	0.01	0.0075
11					-0.0125	0.0125	0
16					-0.0075	-0.005	-0.015
21					-1.38778e-17	-0.005	0.005
36					0.0025	0.005	-0.0125
54					0	-0.005	-0.0175
66					-0.005	-0.005	-0.01
0									0	0	0
5.5									0.115	0.105	0.1525
7.5									0.1825	0.185	0.1125
10.5									0.2	0.21	0.2075
15.5									0.1525	0.205	0.1825
20.5									0.185	0.1925	0.185
35.5									0.185	0.1975	0.1975
53.5									0.175	0.21	0.18
65.5									0.175	0.175	0.1775
0													0	0	0	0
6													0	-0.0075	0.0025	0.015
8													0	-0.005	0.005	0.0125
11													-0.015	0.0025		-0.0025
16													-0.0075	0.01	0.0125	-1.38778e-17
21													-0.01	0.0075	-0.0075	0.005
36													-0.0075	0	0.0025	0.01
54													-1.38778e-17	0.0025	1.38778e-17	0.005
66													0.0075	-0.005	0.015	0.005

## Sheet: Figure 3B upper panel
Time (min)	V2R βarr1			V2R βarr2			V2β2βarr1			V2β2βarr2
0	0	0	0
4	0.505	0.635	0.4975
6	0.4725	0.685	0.6075
9	1.12	1.2925	1.1925
14	1.135	0.965	1.005
19	0.9225	1.025	1.025
34	0.8125	0.7625	0.8525
52	0.77	0.6675	0.7475
64	0.6575	0.7	0.695
0				0	0	0
4.5				0.715	1.075	0.4225
6.5				0.8825	0.81	0.7
9.5				1.245	1.2925	1.315
14.5				1.2275	1.195	1.175
19.5				1.065	1.2425	1.195
34.5				0.985	0.9525	0.97
52.5				0.9825	0.865	0.9375
64.5				0.9825	0.8375	0.955
0							0	0	0
5.5							0.3875	0.4075	0.27
7.5							0.1925	0.325	0.3075
10.5							0.6525	0.695	0.5275
15.5							0.6725	0.6525	0.51
20.5							0.68	0.7475	0.6525
35.5							0.545	0.6575	0.5075
53.5							0.595	0.6475	0.5875
65.5							0.5475	0.5975	0.485
0										0	0	0
6										0.5	0.6175	0.4775
8										0.3775	0.495	0.5975
11										0.7725	0.8375	0.765
16										0.7475	0.765	0.6875
21										0.695	0.81	0.6725
36										0.665	0.6325	0.6375
54										0.72	0.655	0.5725
66										0.67	0.64	0.5675

## Sheet: Figure 3B bottom panel
Time (min)	V2R βarr2			V2β2βarr1			V2β2βarr2
0
1
3
6
11
16
31
46
61
0	0	0	0
1.5	0.14	0.135	0.0875
3.5	0.1275	0.3375	0.2175
6.5	0.7425	0.84	0.8125
11.5	0.925	0.925	0.905
16.5	1.0625	1.0825	1.0075
31.5	1.0475	1.135	1.14
46.5	1.1275	1.0675	1.2175
61.5	1.125	1.1325	1.12
0				0	0	0
2.5				-0.005	0.025	-0.0175
4.5				0.02	0.0175	0.045
7.5				0.0725	0.06	0.0825
12.5				0.0325	0.05	0.0275
17.5				0.095	0.0925	0.08
32.5				0.0525	0.0725	0.055
50.5				0.0675	0.055	0.0275
62.5				0.07	0.055	0.0125
0							0	0	0
3							0.0325	0.035	0.0025
5							0.03	0.0425	0.0275
8							0.085	0.1325	0.115
13							0.085	0.11	0.115
18							0.115	0.1325	0.115
33							0.08	0.0625	0.08
51							0.1275	0.0825	0.075
63							0.075	0.0975	0.0975

## Sheet: Figure 3C upper panel
Time (min)	V2R			V2β2AR
0	0	0	0	0	0	0
1	3687.33	649.833	359	-1508	-527.665	-376.667
2	2142.17	-1232.67	-1470.67	981	2212.33	-997
3	13701.7	-12082.8	-8459.83	-2443	1318.33	-5495.67
4	22278.8	-7829.5	-2933.17	-1617.67	5667.67	-8195.35
5	22265.3	5597.33	10118.2	-2793.32	6265.33	-5216.99
6	20568.3	17667.5	22305.5	-1124.68	6584.33	-3571.66
7	19958.8	27424	34682.3	-3732.99	5767	-4390.34
8	17369.2	40166.2	45354.2	-5606.35	4791.33	-3764.66
9	22507.8	49341.8	54660.7	-9229.99	4017.33	-4327.34
10	26508.7	52272.2	60868.2	-11139	3615	-3045.33
11	29535.8	60794.5	67197	-9398.33	3562.67	-4922
12	33719.7	66917.5	71073.5	-11985.7	3172.33	-2613.66
13	40019.5	72395.3	74178	-9572.32	4027.66	-2122.67
14	41833.2	77457.8	77676.7	-8766.33	2361	-1297
15	44367.5	81341.3	79873.8	-8741.35	4060	-3557.33
16	47062.2	85162	82598.2	-9156.65	5499	-1896.66
17	45503.8	84464.5	83075	-7966.65	3977.33	143
18	50702.7	86795	81641.5	-7767.01	4786	-1436.34
19	50733.5	87674.2	83178.2	-6554.33	4471.67	-1026
20	51048.8	87763.2	82426.3	-7084.67	5404	-1857.33
21	51624.2	89221.7	83451	-8156.32	5333	68.669
22	54436.2	87181	82709.8	-6590.35	5676.33	-790.331

## Sheet: Figure 3C bottom panel
Time (min)	V2R			V2β2AR
0	0	0	0	0	0	0
1	504.333	86.3332	277.667	-184.333	-722.665	70.6668
2	89.3333	671.667	159.667	182	-274	273.667
3	-364.666	1500.33	649.333	528	-626	490.333
4	2010	6009.67	4524.67	272.667	-146	797.333
5	4141.67	12754.7	9281.33	520.334	247	804
6	5256.67	17854	12515.7	583.334	639.667	920.667
7	6125.67	21815.7	14619.7	785	443.667	1063
8	6688	23809	16117.3	770.666	932	703.333
9	6719.33	24163	16953.7	569.667	1103	759.667
10	6259.67	23792.3	16550.7	260.667	881	1336.67
11	5720	24626	17424	204.333	701	511.667
12	5889	24706.3	17458.3	285.332	761	1168.33
13	6022	23827.7	17409	272.667	380.667	1125.33
14	6055	25131.3	17318.3	430.333	3.33333	922
15	5129.67	24139.3	16595.7	352.333	1179.33	1021.33
16	5007	24189	16159.3	-183.332	931.667	1162.67
17	5635.67	23886.3	16315.7	470.666	868	1144.33
18	4744	23558.3	16156.3	212	580.667	1446.33
19	5246.67	22734	15286	258.333	991	1171.33
20	5147.33	22726.7	15470.7	197.999	674.333	840
21	4782	22699.7	14965	281.999	1117.33	1029.67
22	5097.67	21822	14546.3	-477.333	1273.67	940

## Sheet: Figure 3F
	V2R						V2β2
mGs	71.85	82.79	51.26	92.65	78.42	65.12	36.2	30.98	49.61	52.59	37.15	24.29
mGsq	89.18	91.1	81.85	79.41	73.76	86	39.3	22.17	45.61	41.75	25.98	8.93

## Sheet: Figure 3G
	V2R															V2β2AR
mGs	12.5	28.5714	0	0	28.5714	0	0	0	9.09091	0	0	0	0	16.6667	0	100	37.5	70	87.5	66.6667	92.8571	83.3333	66.6667	75	100	87.5	80	100	85.7143	100
mGsq	0	0	0	7.69231	0	12.5	3.33333	12.5	11.1111	6.66667	9.09091	0	0	7.14286	0	100	75	72.7273	88.8889	100	100	78.9474	83.3333	73.3333	80	73.3333	80	90.4762	75	84.2105
